# Supplementary material
Source: Springer Nature journal article supplement (https://www.springermedizin.de/resource/supplementary/12889_2012_4374_MOESM1_ESM.pdf/9492240)
Supplement: MOESM1 [file 9492240]

## Additional file 1: Variables and measures

| Category                      | Variable                                                                                                                                                      | Test    | Test/Reference                                                                   | S1 | T0 | T1 | T2 |
|-------------------------------|---------------------------------------------------------------------------------------------------------------------------------------------------------------|---------|----------------------------------------------------------------------------------|----|----|----|----|
| <b>Cognitive ability</b>      | Mental status                                                                                                                                                 | ST      | Mini Mental State Examination [1,2]                                              | ✓  |    |    |    |
|                               | English language (level)                                                                                                                                      | SR      | Education and self-reported difficulty understanding the screening questionnaire | ✓  |    |    |    |
| <b>Behavioural predictors</b> | Attitude, intention, subjective norms and self-efficacy relating to goals (Goal: following doctor's recommendation)                                           | E-SR, I | Modified Brief IAT and matching self-report (Figure 2 and Table 1)               |    | ✓  | ✓  | ✓  |
|                               | Attitude, intention, subjective norms and self-efficacy relating to specific behaviours (Implementation: taking medication and doing the prescribed exercise) | E-SR, I | Modified Brief IAT and matching self-report (Figure 2 and Table 1)               |    | ✓  | ✓  | ✓  |
|                               | Outcome beliefs regarding medication and exercise                                                                                                             | SR      | 3 items each                                                                     |    | ✓  | ✓  | ✓  |
|                               | Anticipated regret                                                                                                                                            | SR      | 1 item each                                                                      |    | ✓  | ✓  | ✓  |
|                               | Self-efficacy                                                                                                                                                 | SR      | 3 items                                                                          |    | ✓  | ✓  | ✓  |

|                    |                                          |            |                                                                                       |   |   |   |   |
|--------------------|------------------------------------------|------------|---------------------------------------------------------------------------------------|---|---|---|---|
| <b>Wellbeing</b>   | Perceived quality of life and health     | SR         | Single item self-assessment                                                           | ✓ |   |   |   |
|                    | Perceived quality of life                | SRS        | Functional Assessment of Human Immunodeficiency Virus Infection (FAHI), Version 4 [3] |   | ✓ | ✓ | ✓ |
|                    | Perceived health                         | SR         | Single item self assessment                                                           | ✓ |   |   |   |
| <b>Personality</b> | Need for cognition                       | SRS        | Rational Experimental Inventory Scale [4]                                             |   | ✓ | ✓ | ✓ |
|                    | Conscientiousness                        | SRS        | NEO FFI subscale [5]                                                                  |   | ✓ | ✓ | ✓ |
|                    | Social desirability                      | SRS        | Short form M-C 2 (10) [6]                                                             |   | ✓ | ✓ | ✓ |
|                    | Global self-esteem                       | I          | single question implicit global self esteem [7]                                       | ✓ | ✓ | ✓ | ✓ |
| <b>Behaviour</b>   | Physical activity involved in daily work | SR         | Self-report                                                                           | ✓ |   |   |   |
|                    | Physical Activity                        | SR         | International Physical Activity Questionnaire [8]                                     |   | ✓ | ✓ | ✓ |
|                    | Adherence to medication                  | SR         | Direct question                                                                       |   | ✓ | ✓ | ✓ |
|                    | Reasons for non-adherence to medication  | SR         | ACTG Baseline Adherence Questionnaire [9]                                             |   | ✓ | ✓ | ✓ |
|                    | Adherence to exercise (intervention)     |            | Attendance log                                                                        |   | ✓ |   |   |
|                    | Adherence to exercise (off site)         | SRS,<br>SR | Self-report based on [9], Exercise diary                                              |   | ✓ | ✓ | ✓ |

|                            |                                                                                                                                                                                                   |          |                                             |   |   |   |   |
|----------------------------|---------------------------------------------------------------------------------------------------------------------------------------------------------------------------------------------------|----------|---------------------------------------------|---|---|---|---|
| <b>Physical assessment</b> | Height                                                                                                                                                                                            | DM       | Measure taken by physiotherapist            |   | ✓ |   |   |
|                            | Weight, circumferential measures, rest heart rate                                                                                                                                                 | DM       | Measure taken by physiotherapist            |   | ✓ | ✓ | ✓ |
|                            | Fitness                                                                                                                                                                                           | DM       | 6 minute walk test [10,11]                  |   | ✓ | ✓ | ✓ |
|                            | Strength                                                                                                                                                                                          | DM       | One repetition maximums for eight exercises |   | ✓ | ✓ | ✓ |
|                            | Flexibility                                                                                                                                                                                       | DM       | Sit & reach test [12]                       |   | ✓ | ✓ | ✓ |
| <b>Clinical data</b>       | Viral load (copies/mL), CD4 counts (cells/mm <sup>3</sup> ), prescribed medication details, referral reasons, the presence of other chronic illness(es), route of infection, time since diagnosis | MR       | Anonymised medical records                  |   |   |   | ✓ |
| <b>Demographics</b>        | Age, sex and ethnic origin                                                                                                                                                                        | SR<br>MR | Anonymised medical records                  | ✓ |   |   | ✓ |
| <b>Hair sample</b>         | 50g cut hair                                                                                                                                                                                      | DM       | taken by physiotherapist                    |   |   |   | ✓ |

E: explicit self-report, I: implicit association, DM: direct measure, MR: medical record, SR: self-report SRS: self-reported scale, ST: screening test

## References:

1. Folstein MF, Folstein SE, McHugh PR: **"Mini-mental state". A practical method for grading the cognitive state of patients for the clinician.** *J Psychiatric Res* 1975, **12**:189–198.
2. O'Bryant SE, Humphreys JD, Smith GE, Ivnik RJ, Graff-Radford NR, Petersen RC, Lucas JA: **Detecting dementia with the mini-mental state examination in highly educated individuals.** *Arch Neurol* 2008, **65**:963-967.
3. Peterman AH, Cella D, Mo F, McCain N: **Psychometric validation of the revised Functional Assessment of Human Immunodeficiency Virus Infection (FAHI) quality of life instrument.** *Qual Life Res* 1997, **6**:572-584.
4. Epstein S, Pacini R, Denes-Raj V, Heier H: **Individual differences in intuitive–experiential and analytical–rational thinking styles.** *J Pers Social Psychol* 1996, **71**:390-405.
5. Costa PT, McCrae RR: *The NEO Five Factor Inventory (NEO FFI)*. Florida: Psychological Assessment Resources Inc. 1992.
6. Strahan R, Gerbasi KC: **Short, homogeneous versions of the Marlowe-Crowne Social Desirability Scale.** *J Clin Psychol* 1972, **28**:191-193.
7. Gebauer JE, Riketta MB, Broemer P, Maio GR: **"How much do you like your name?" An implicit measure of global self-esteem.** *J Exp Soc Psychol* 2008, **44**:1346-1354.
8. International Physical Activity Questionnaire (IPAQ). [<https://sites.google.com/site/theipaq/>]
9. NAISD Adult AIDS Clinical Trials Group: **ACTG Baseline Adherence Questionnaire.** [<https://actgnetwork.org>].
10. Guyatt GH, Sullivan MJ, Thompson PJ, Fallen EL, Pugsley SO, Taylor WA, Bernman LB: **The 6-minute walk: a new measure of exercise capacity in patients with chronic heart failure.** *Can Med Assoc J* 1985, **132**:919-923.
11. Passantino A, Lagioia R, Mastropasqua F, Scrutino D: **Short-term change in distance walked in 6 minutes is an indicator of outcome in patients with chronic heart failure in clinical practice.** *J Am Coll Cardiol* 2006, **48**:99-105.
12. Sit & Reach Test [<http://www.topendsports.com/testing/tests/sit&reach.htm>].
